# Supplementary material for: Dynamic Microstructure Assembly Driven by Lysinibacillus sp. LF-N1 and Penicillium oxalicum DH-1 Inoculants Corresponds to Composting Performance
Source: MDPI journal article supplement (doi:10.3390/microorganisms10040709), 2022-03-25
Supplement: s1 [file s1]

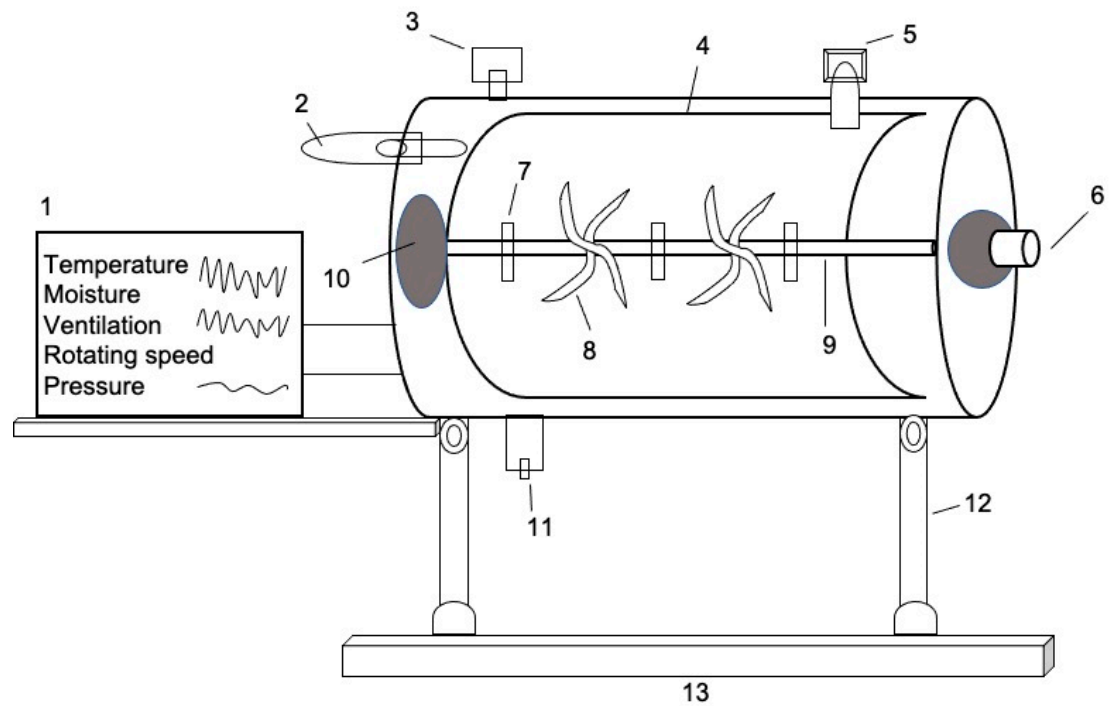

Figure S1. Composting reactor. 1. Screen; 2. air outlet; 3. water intake; 4. reactor; 5. air intake; 6. sampling collection port; 7. temperature sensor; 8. stirring paddle; 9. rotating shaft; 10. raw material inlet; 11. water outlet; 12. fixed rod; 13. support bottom plate.

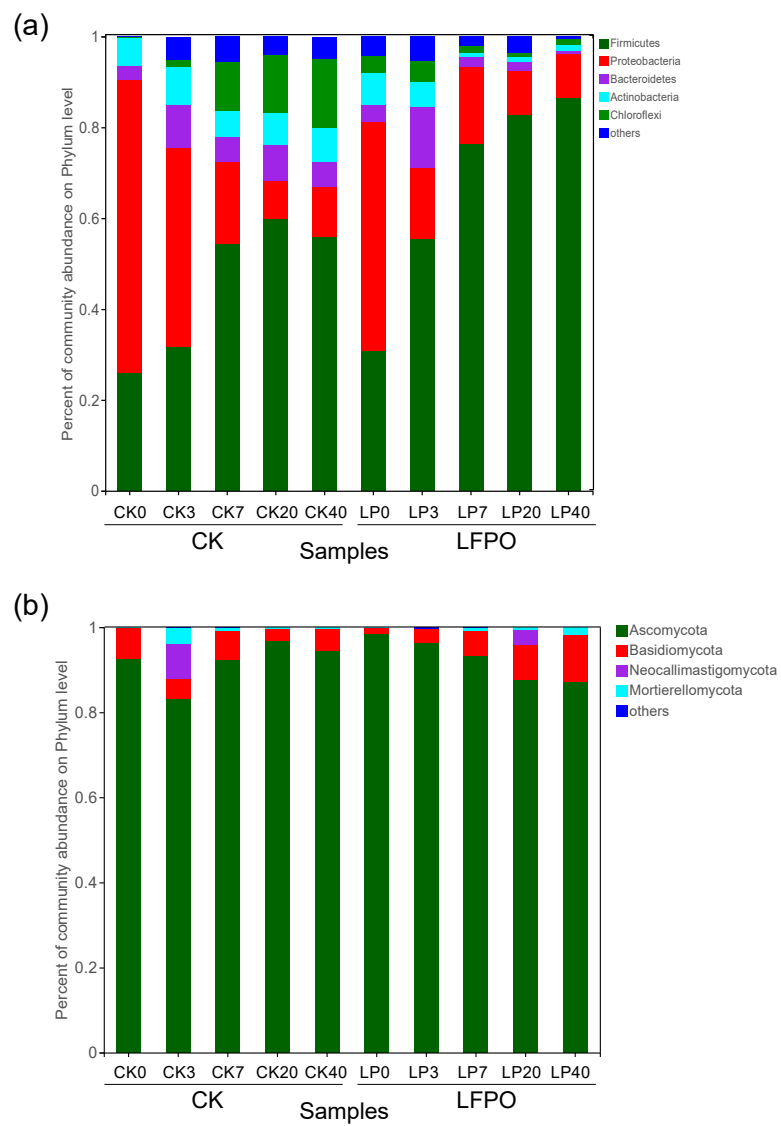

Figure S2. (a) The relative abundance of bacterial taxa at the phylum level. (b) The relative abundance of fungal taxa at the phylum level;

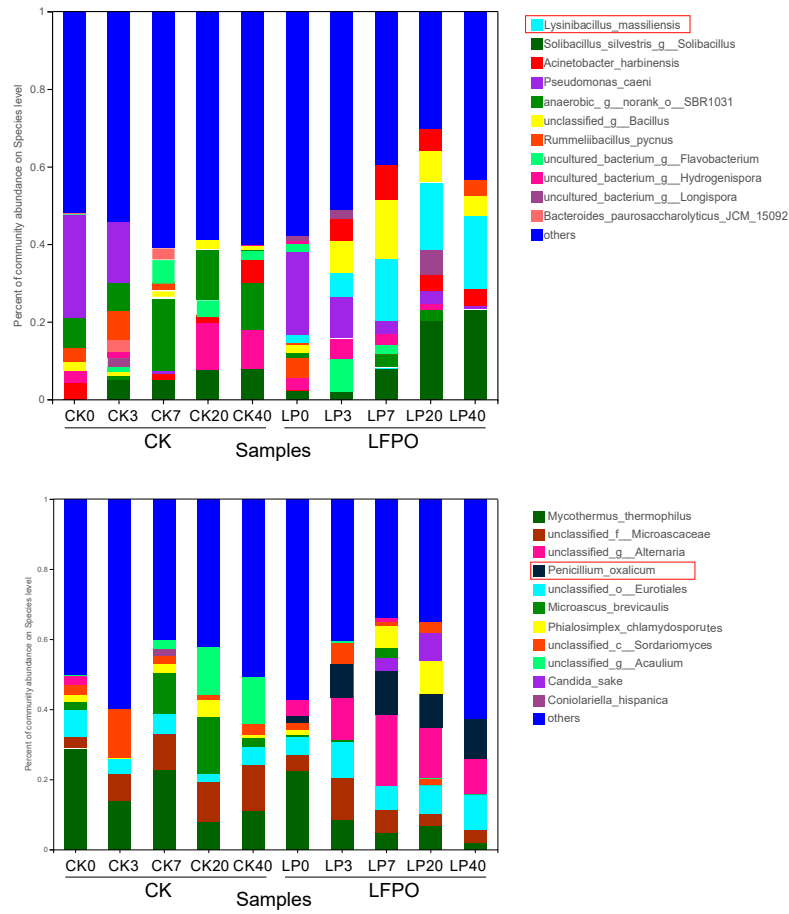

Figure S3. (a) The relative abundance of bacterial taxa at the species level. (b) The relative abundance of fungal taxa at the species level;

Table S1. The topological parameters of co-networks.

| Object           | Parameters                      | CK     | LFPO   |
|------------------|---------------------------------|--------|--------|
| Network Overview | Average Degree                  | 5.934  | 3.447  |
|                  | Network Diameter                | 12     | 9      |
|                  | Graph Density                   | 0.099  | 0.075  |
|                  | Modularity                      | 0.654  | 0.641  |
| Node Overview    | Connected components            | 3      | 3      |
|                  | Nodes number                    | 61     | 46     |
|                  | Clustering Coefficient          | 0.337  | 0.632  |
| Edge Overview    | Eigenvector Centrality (100run) | 0.0097 | 0.0054 |
|                  | Edge number                     | 181    | 95     |
| Overview         | Path length                     | 5.058  | 4.072  |
